# Supplementary material for: Brief Communication: Decadal changes in topography, surface water and subsurface structure across an Arctic coastal tundra site
Source: Copernicus journal article supplement (doi:10.5194/egusphere-2025-2341), 2025-06-05
Supplement: Supplementary file 1 [file egusphere-2025-2341-supplement.pdf]

# Supplementary Material for

## Brief Communication: Decadal changes in topography, surface water and subsurface structure across an Arctic coastal tundra site

Jonathan A. Bachman<sup>1</sup>, John Lamb<sup>1</sup>, Craig Ulrich<sup>1</sup>, Neslihan Taş<sup>1</sup>, Baptiste Dafflon<sup>1</sup>

<sup>1</sup>Earth and Environmental Sciences, Lawrence Berkeley National Laboratory, Berkeley, CA, USA

Correspondence to: Baptiste Dafflon (bdafflon@lbl.gov)

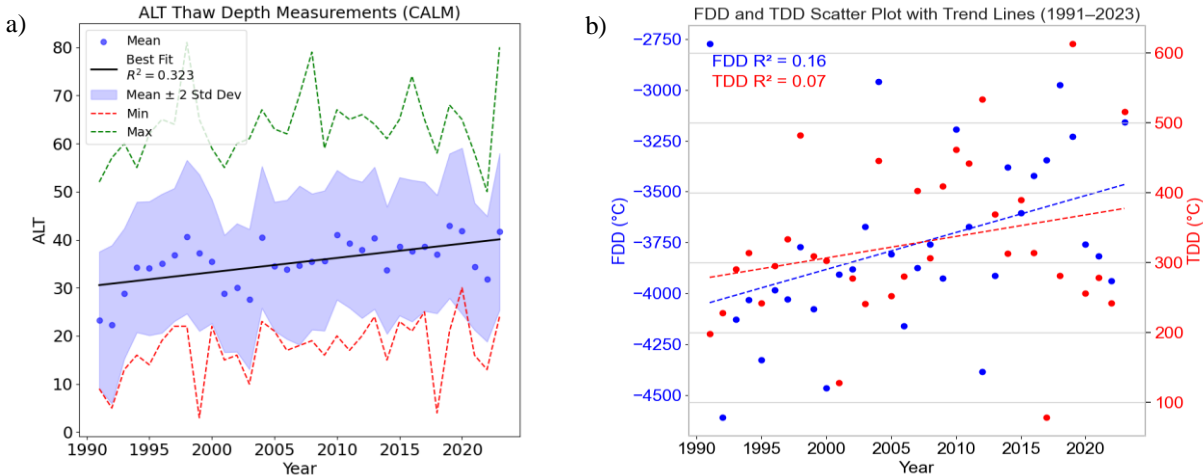

**Figure S1.** Temporal trends in the Utqiagvik area, including a) Freezing Degree Days (FDD) and Thawing Degree Days (TDD) inferred from air temperature data from the NOAA Barrow Atmospheric Baseline Observatory and b) Active Layer Thickness (ALT) from the nearby NCALM site (Shiklomanov, 2023). TDD was calculated by summing all positive values over the summer period, from 15 May to 31 October, and FDD by summing all negative values from 1 November to 14 May (Farquharson et al., 2022).
